# Supplementary material for: Effects of Mg Doping at Different Positions in Li-Rich Mn-Based Cathode Material on Electrochemical Performance
Source: MDPI journal article supplement (doi:10.3390/nano12010156), 2022-01-03
Supplement: s1 [file s1]

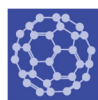

## Supplementary Materials

## Effects of Mg Doping at Different Positions in Li-Rich Mn-Based Cathode Material on Electrochemical Performance

Elena Makhonina <sup>1,\*</sup>, Lidia Pechen <sup>1</sup>, Anna Medvedeva <sup>1</sup>, Yury Politov <sup>1</sup>, Aleksander Rumyantsev <sup>2</sup>, Yury Koshtyal <sup>2</sup>, Vyacheslav Volkov <sup>1</sup>, Alexander Goloveshkin <sup>3</sup> and Igor Eremenko <sup>1,\*</sup>

- 1 Kurnakov Institute of General and Inorganic Chemistry, Russian Academy of Sciences, 31 Leninsky pr., 119991 Moscow, Russia; lidia.s.maslennikova@gmail.com (L.P.); anna.ev.medvedeva@gmail.com (A.M.); polserv@mail.ru (Y.P.); svolkov77@gmail.com (V.V.)  
2 Ioffe Institute, Russian Academy of Sciences, 26 Politekhnicheskaya ul., 194021 St. Petersburg, Russia; rumyantsev.amr@gmail.com (A.R.); yury.koshtyal@gmail.com (Y.K.)  
3 Nesmeyanov Institute of Organoelement Compounds, Russian Academy of Sciences, 28 Vavilova ul., 119334 Moscow, Russia; golov-1@mail.ru (A.G.)  
\* Correspondence: evma@igic.ras.ru (E.M.); ilerem@igic.ras.ru (I.E.); Tel.: +7-903-143-17-38 (E.M.)

Table S1. ICP-MS analysis results.

| Sample    | Determined composition                                                                            | Targeted composition                                                                             |
|-----------|---------------------------------------------------------------------------------------------------|--------------------------------------------------------------------------------------------------|
| LR        | $\text{Li}_{1.219}\text{Mn}_{0.523}\text{Ni}_{0.129}\text{Co}_{0.129}\text{O}_2$                  | $\text{Li}_{1.20}\text{Mn}_{0.534}\text{Ni}_{0.133}\text{Co}_{0.133}\text{O}_2$                  |
| LR-Mg     | $\text{Li}_{1.197}\text{Mn}_{0.537}\text{Ni}_{0.128}\text{Co}_{0.111}\text{Mg}_{0.027}\text{O}_2$ | $\text{Li}_{1.20}\text{Mn}_{0.534}\text{Ni}_{0.133}\text{Co}_{0.113}\text{Mg}_{0.020}\text{O}_2$ |
| LR-Mg(st) | $\text{Li}_{1.19}\text{Mg}_{0.02}\text{Mn}_{0.531}\text{Ni}_{0.130}\text{Co}_{0.129}\text{O}_2$   | $\text{Li}_{1.18}\text{Mg}_{0.02}\text{Mn}_{0.534}\text{Ni}_{0.133}\text{Co}_{0.133}\text{O}_2$  |

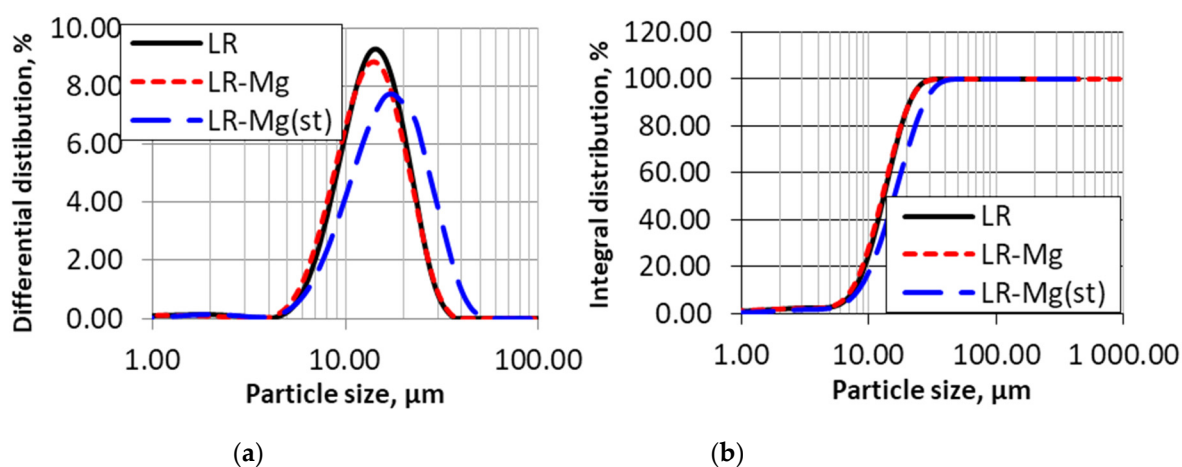

Figure S1. Particle size distributions for LR, LR-Mg, and LR-Mg(st) oxides: (a) Differential distribution; (b) Integral distribution.

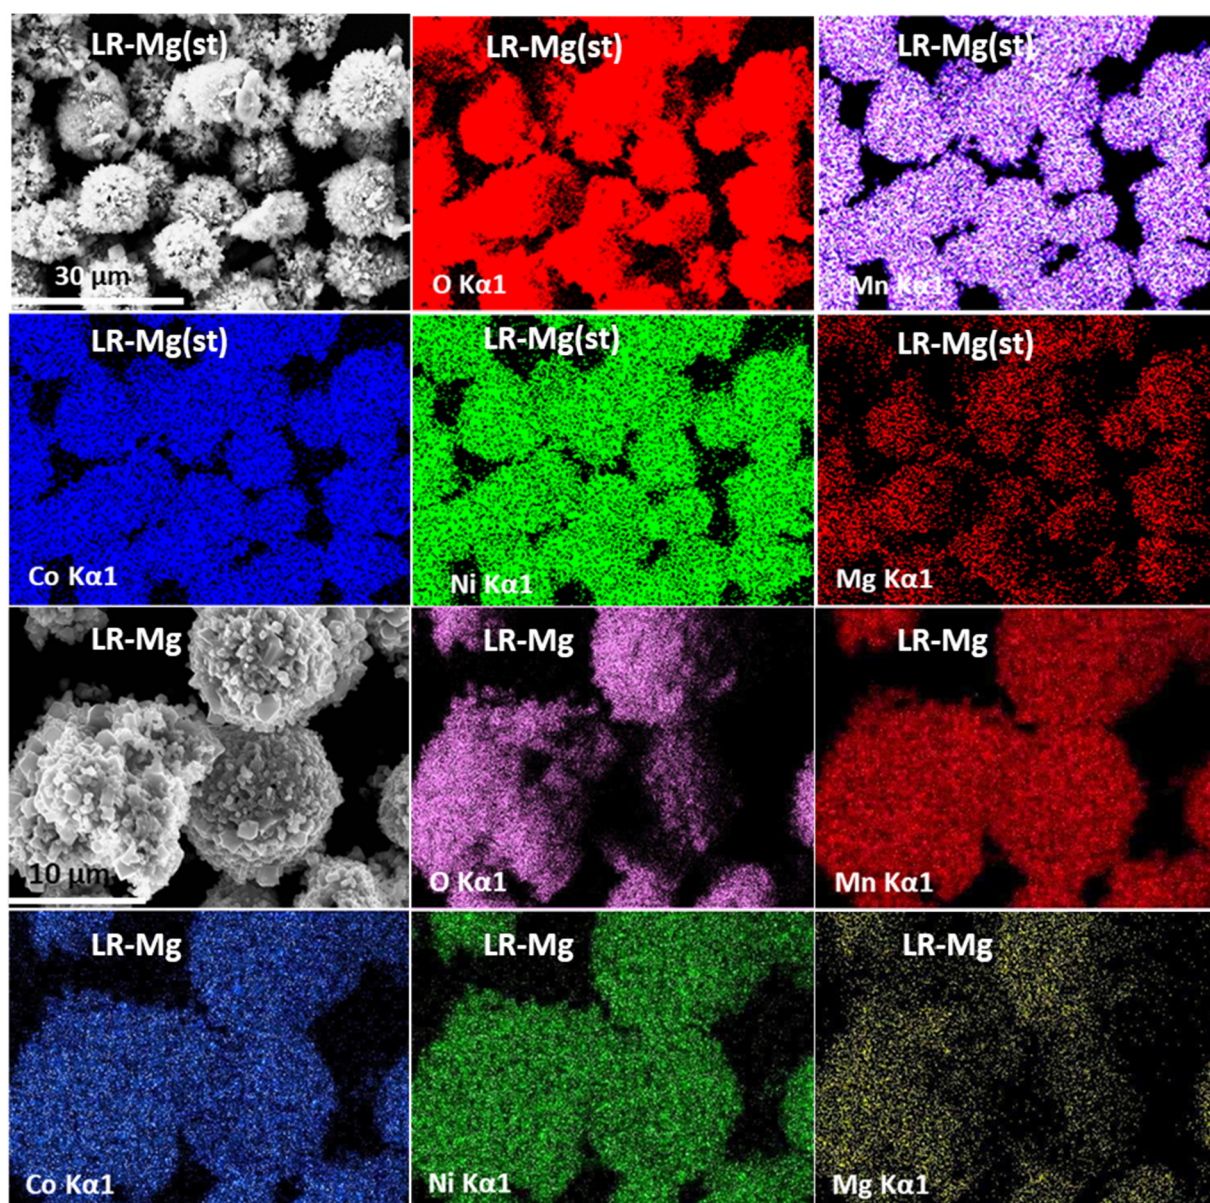

**Figure S2.** Element distribution EDS maps of LR-Mg and LR-Mg(st) oxides (see designations on the figures).
